# Supplementary material
Source: PubMed Central journal article supplement (PMC3985682)
Supplement: bi4016583_si_001.pdf [file bi4016583_si_001.pdf]

**Supporting information for**

**The unique effect of Cu(II) in the metal-induced amyloid formation  
of  $\beta$ -2-microglobulin**

Jia Dong, Crisjoe A. Joseph, Nicholas B. Borotto, Vanessa L. Gill, Michael J. Maroney,  
Richard W. Vachet

**Table S1.** Single scattering EXAFS fits for Ni- $\beta$ 2m. Fits carried out in r-space ( $\Delta k = 2$  to  $12.5 \text{ \AA}^{-1}$ ;  $\Delta R = 1$  to  $2.5 \text{ \AA}$ ) with a Kaiser-Bessel window with  $dk = 1$ , a  $k$ -weight = 3 and  $S_0 = 0.9$ . Initial input metal-ligand distances were  $2.0 \text{ \AA}$  for Ni-N(O),  $2.3 \text{ \AA}$  for Ni-S and  $2.4 \text{ \AA}$  for Ni-Br. #v number is the number of independent variables used in the fit.

| Model                                                                                    | R factor | Reduced $\chi^2$ | $\chi^2$ | #v |
|------------------------------------------------------------------------------------------|----------|------------------|----------|----|
| <b><i>XN where X is the number of nitrogen atoms (N)</i></b>                             |          |                  |          |    |
| '2N'                                                                                     | 0.2791   | 60.64            | 1018.623 | 3  |
| '3N'                                                                                     | 0.1773   | 38.521           | 647.064  | 3  |
| '4N'                                                                                     | 0.1211   | 26.317           | 442.072  | 3  |
| '5N'                                                                                     | 0.0963   | 20.919           | 351.391  | 3  |
| '6N'                                                                                     | 0.094    | 20.426           | 343.105  | 3  |
| '7N'                                                                                     | 0.1082   | 23.511           | 394.933  | 3  |
| <b><i>AS where A is the number of sulfur atoms (S)</i></b>                               |          |                  |          |    |
| '2S'                                                                                     | 0.2294   | 49.838           | 837.17   | 3  |
| '3S'                                                                                     | 0.1716   | 37.289           | 626.381  | 3  |
| '4S'                                                                                     | 0.1518   | 32.983           | 554.039  | 3  |
| '5S'                                                                                     | 0.1527   | 33.173           | 557.24   | 3  |
| '6S'                                                                                     | 0.1653   | 35.905           | 603.133  | 3  |
| '7S'                                                                                     | 0.1844   | 40.053           | 672.805  | 3  |
| <b><i>XNYN where X and Y are the number of nitrogen atoms (N) in separate shells</i></b> |          |                  |          |    |
| '2N1N'                                                                                   | 0.1367   | 33.708           | 498.808  | 5  |
| '2N2N'                                                                                   | 0.0858   | 21.165           | 313.203  | 5  |
| '3N1N'                                                                                   | 0.0894   | 22.056           | 326.383  | 5  |
| '4N1N'                                                                                   | 0.0773   | 19.069           | 282.181  | 5  |
| '5N1N'                                                                                   | 0.081    | 19.973           | 295.555  | 5  |
| '6N1N'                                                                                   | 0.0946   | 23.331           | 345.244  | 5  |
| '3N2N'                                                                                   | 0.0764   | 18.841           | 278.808  | 5  |
| '3N3N'                                                                                   | 0.0834   | 20.575           | 304.466  | 5  |
| '4N2N'                                                                                   | 0.082    | 20.217           | 299.175  | 5  |
| '5N2N'                                                                                   | 0.0957   | 23.595           | 349.156  | 5  |
| '4N3N'                                                                                   | 0.0967   | 23.844           | 352.84   | 5  |

| Model                                                                                                              | R factor | Reduced $\chi^2$ | $\chi^2$ | #v |
|--------------------------------------------------------------------------------------------------------------------|----------|------------------|----------|----|
| <b>ASBS where A and B are the number of sulfur atoms (S) in separate shells</b>                                    |          |                  |          |    |
| '2S1S'                                                                                                             | 0.1254   | 30.933           | 457.737  | 5  |
| '2S2S'                                                                                                             | 0.1049   | 25.867           | 382.781  | 5  |
| '3S1S'                                                                                                             | 0.1052   | 25.949           | 383.996  | 5  |
| '4S1S'                                                                                                             | 0.103    | 25.391           | 375.731  | 5  |
| '5S1S'                                                                                                             | 0.1114   | 27.481           | 406.659  | 5  |
| '6S1S'                                                                                                             | 0.1653   | 40.758           | 603.133  | 5  |
| '3S2S'                                                                                                             | 0.1013   | 24.985           | 369.725  | 5  |
| '4S2S'                                                                                                             | 0.1079   | 26.609           | 393.752  | 5  |
| '3S3S'                                                                                                             | 0.1059   | 26.125           | 386.599  | 5  |
| '5S2S'                                                                                                             | 0.1202   | 29.643           | 438.655  | 5  |
| '4S3S'                                                                                                             | 0.1162   | 28.665           | 424.176  | 5  |
| <b>XNAS where X is the number of nitrogen atoms (N) and A is the number of sulfur atoms (S) in separate shells</b> |          |                  |          |    |
| '2N1S'                                                                                                             | 0.1268   | 31.263           | 462.626  | 5  |
| '1N2S'                                                                                                             | 0.1353   | 33.358           | 493.619  | 5  |
| '2N2S'                                                                                                             | 0.1058   | 26.096           | 386.163  | 5  |
| '3N1S'                                                                                                             | 0.0941   | 23.197           | 343.267  | 5  |
| '1N3S'                                                                                                             | 0.1667   | 41.121           | 608.505  | 5  |
| '1N4S'                                                                                                             | 0.1108   | 27.324           | 404.342  | 5  |
| '4N1S'                                                                                                             | 0.0837   | 20.651           | 305.583  | 5  |
| '2N3S'                                                                                                             | 0.0992   | 24.46            | 361.95   | 5  |
| '3N2S'                                                                                                             | 0.0915   | 22.567           | 333.946  | 5  |
| '5N1S'                                                                                                             | 0.0883   | 21.776           | 322.238  | 5  |
| '1N5S'                                                                                                             | 0.1238   | 30.518           | 451.605  | 5  |
| '4N2S'                                                                                                             | 0.0891   | 21.966           | 325.05   | 5  |
| '2N4S'                                                                                                             | 0.0973   | 23.993           | 355.05   | 5  |
| '3N3S'                                                                                                             | 0.0927   | 22.852           | 338.163  | 5  |
| '6N1S'                                                                                                             | 0.0778   | 19.187           | 283.923  | 5  |
| '1N6S'                                                                                                             | 0.1227   | 30.256           | 447.728  | 5  |
| '5N2S'                                                                                                             | 0.091    | 22.452           | 332.241  | 5  |
| '2N5S'                                                                                                             | 0.1131   | 27.891           | 412.72   | 5  |
| '4N3S'                                                                                                             | 0.0918   | 22.637           | 334.976  | 5  |
| '3N4S'                                                                                                             | 0.094    | 23.173           | 342.915  | 5  |

**Table S2.** Multiple-scattering EXAFS fits for Ni- $\beta$ 2m. Fits carried out in r-space ( $\Delta k = 2$  to  $12.5 \text{ \AA}^{-1}$ ;  $\Delta R = 1$  to  $4.5 \text{ \AA}$ ) with a Kaiser-Bessel window with  $dk = 1$ , a  $k$ -weight = 3 and  $S_0 = 0.9$ . Imidazole scattering paths with an amplitude of 10% or higher were included. Initial input metal-ligand distances were  $2.0 \text{ \AA}$  for Ni-N(O),  $2.3 \text{ \AA}$  for Ni-S and  $2.4 \text{ \AA}$  for Ni-Br. #v number is the number of independent variables used in the fit. Fits that did not converge or produced results outside the resolution of the instrument are not shown.

| Model                                                                                                                                                                          | R factor | Reduced $\chi^2$ | $\chi^2$ | #v |
|--------------------------------------------------------------------------------------------------------------------------------------------------------------------------------|----------|------------------|----------|----|
| <b>(XNWH) where X is the number of nitrogen atoms (N) and W is the number of imidazoles (H) in the same shell</b>                                                              |          |                  |          |    |
| '(1N1H)'                                                                                                                                                                       | 0.2913   | 67.3             | 1063.188 | 4  |
| '(2N1H)'                                                                                                                                                                       | 0.1761   | 40.671           | 642.512  | 4  |
| '(3N1H)'                                                                                                                                                                       | 0.1128   | 26.045           | 411.456  | 4  |
| '(4N1H)'                                                                                                                                                                       | 0.0832   | 19.211           | 303.494  | 4  |
| '(5N1H)'                                                                                                                                                                       | 0.0771   | 17.813           | 281.412  | 4  |
| '(6N1H)'                                                                                                                                                                       | 0.0869   | 20.082           | 317.255  | 4  |
| <b>XNWH where X is the number of nitrogen atoms (N) and W is the number of imidazoles (H) in separate shells</b>                                                               |          |                  |          |    |
| '3N1H'                                                                                                                                                                         | 0.1124   | 27.714           | 410.109  | 5  |
| '4N1H'                                                                                                                                                                         | 0.0824   | 20.317           | 300.65   | 5  |
| '5N1H'                                                                                                                                                                         | 0.0755   | 18.63            | 275.691  | 5  |
| '6N1H'                                                                                                                                                                         | 0.0837   | 20.652           | 305.612  | 5  |
| '2N2H'                                                                                                                                                                         | 0.1293   | 31.889           | 471.887  | 5  |
| '3N2H'                                                                                                                                                                         | 0.0898   | 22.138           | 327.598  | 5  |
| '4N2H'                                                                                                                                                                         | 0.0774   | 19.092           | 282.525  | 5  |
| '5N2H'                                                                                                                                                                         | 0.0843   | 20.778           | 307.469  | 5  |
| <b>(XNWH)YN where X is the number of nitrogen atoms (N), W is the number of imidazoles (H) in the same shell and Y is the number of nitrogen atoms (N) in a separate shell</b> |          |                  |          |    |
| '(1N1H)1N'                                                                                                                                                                     | 0.145    | 38.358           | 529.254  | 6  |
| '(2N1H)1N'                                                                                                                                                                     | 0.0858   | 22.705           | 313.285  | 6  |
| '(3N1H)1N'                                                                                                                                                                     | 0.0645   | 17.048           | 235.227  | 6  |
| '(4N1H)1N'                                                                                                                                                                     | 0.0632   | 16.705           | 230.496  | 6  |
| '(5N1H)1N'                                                                                                                                                                     | 0.0734   | 19.418           | 267.925  | 6  |
| <b>(XNWH)AS where X is the number of nitrogen atoms (N), W is the number of imidazoles (H) in the same shell and A is the number of sulfurs atoms (S) in a separate shell</b>  |          |                  |          |    |
| '(1N1H)1S'                                                                                                                                                                     | 0.1473   | 38.948           | 537.403  | 6  |
| '(2N1H)1S'                                                                                                                                                                     | 0.0949   | 25.087           | 346.151  | 6  |
| '(3N1H)1S'                                                                                                                                                                     | 0.0754   | 19.936           | 275.073  | 6  |
| '(4N1H)1S'                                                                                                                                                                     | 0.075    | 19.839           | 273.742  | 6  |
| '(5N1H)1S'                                                                                                                                                                     | 0.0598   | 15.825           | 218.35   | 6  |

| Model                                                                                                                                                                           | R factor | Reduced $\chi^2$ | $\chi^2$ | #v |
|---------------------------------------------------------------------------------------------------------------------------------------------------------------------------------|----------|------------------|----------|----|
| <b>(XNWH)CBr</b> where X is the number of nitrogen atoms (N), W is the number of imidazoles (H) in the same shell and C is the number of bromine atoms (Br) in a separate shell |          |                  |          |    |
| '(1N1H)1Br'                                                                                                                                                                     | 0.2211   | 58.473           | 806.801  | 6  |
| '(2N1H)1Br'                                                                                                                                                                     | 0.1255   | 33.198           | 458.059  | 6  |
| '(3N1H)1Br'                                                                                                                                                                     | 0.0797   | 21.068           | 290.69   | 6  |
| '(4N1H)1Br'                                                                                                                                                                     | 0.0642   | 16.981           | 234.301  | 6  |
| '(5N1H)1Br'                                                                                                                                                                     | 0.0679   | 17.947           | 247.633  | 6  |
| <b>XNYNWH</b> where X and Y are the number of nitrogen atoms (N) and W is the number of imidazoles (H) in separate shells                                                       |          |                  |          |    |
| '2N1N1H'                                                                                                                                                                        | 0.0767   | 21.873           | 279.921  | 7  |
| '3N1N1H'                                                                                                                                                                        | 0.0605   | 17.252           | 220.784  | 7  |
| '4N1N1H'                                                                                                                                                                        | 0.0617   | 17.583           | 225.024  | 7  |
| '5N1N1H'                                                                                                                                                                        | 0.0731   | 20.833           | 266.622  | 7  |
| '1N2N1H'                                                                                                                                                                        | 0.0727   | 20.724           | 265.218  | 7  |
| '2N2N1H'                                                                                                                                                                        | 0.0596   | 17.003           | 217.597  | 7  |
| '3N2N1H'                                                                                                                                                                        | 0.0624   | 17.794           | 227.72   | 7  |
| '4N2N1H'                                                                                                                                                                        | 0.0742   | 21.153           | 270.719  | 7  |
| '1N1N2H'                                                                                                                                                                        | 0.0936   | 26.7             | 341.7    | 7  |
| '2N1N2H'                                                                                                                                                                        | 0.0673   | 19.179           | 245.448  | 7  |
| '3N1N2H'                                                                                                                                                                        | 0.0616   | 17.556           | 224.68   | 7  |
| '4N1N2H'                                                                                                                                                                        | 0.0695   | 19.822           | 253.684  | 7  |
| <b>XNASWH</b> where X is the number of nitrogen atoms (N), A is the number of sulfur atoms (S) and W is the number of imidazoles (H) in separate shells                         |          |                  |          |    |
| '2N1S1H'                                                                                                                                                                        | 0.0948   | 27.039           | 346.046  | 7  |
| '3N1S1H'                                                                                                                                                                        | 0.0753   | 21.486           | 274.973  | 7  |
| '4N1S1H'                                                                                                                                                                        | 0.0749   | 21.356           | 273.306  | 7  |
| '5N1S1H'                                                                                                                                                                        | 0.0568   | 16.208           | 207.425  | 7  |
| '1N2S1H'                                                                                                                                                                        | 0.118    | 33.655           | 430.706  | 7  |
| '2N2S1H'                                                                                                                                                                        | 0.0904   | 25.766           | 329.755  | 7  |
| '3N2S1H'                                                                                                                                                                        | 0.0813   | 23.181           | 296.662  | 7  |
| '4N2S1H'                                                                                                                                                                        | 0.0748   | 21.33            | 272.974  | 7  |
| '2N1S2H'                                                                                                                                                                        | 0.0821   | 23.409           | 299.581  | 7  |
| '3N1S2H'                                                                                                                                                                        | 0.0735   | 20.965           | 268.301  | 7  |
| '4N1S2H'                                                                                                                                                                        | 0.0612   | 17.441           | 223.21   | 7  |
| '1N2S2H'                                                                                                                                                                        | 0.1819   | 51.876           | 663.896  | 7  |
| '2N2S2H'                                                                                                                                                                        | 0.0857   | 24.425           | 312.593  | 7  |
| '3N2S2H'                                                                                                                                                                        | 0.0785   | 22.394           | 286.594  | 7  |
| '1N1S3H'                                                                                                                                                                        | 0.1064   | 30.329           | 388.147  | 7  |
| '2N1S3H'                                                                                                                                                                        | 0.08     | 22.807           | 291.883  | 7  |
| '3N1S3H'                                                                                                                                                                        | 0.0802   | 22.858           | 292.53   | 7  |

**Table S3.** Table showing bond distances,  $\sigma^2$  component of the Debye-Waller factors and energy shifts for relevant EXAFS fits from the multiple-scattering EXAFS fits for Ni- $\beta$ 2m (see above). Fits were carried out as described above. The fit in **bold** was determined to be the best model. Values in **red** are used to discount the model as they produce a physically unreasonable number.

| Ni Model               |       | Radius, R' (Å) | $\sigma^2$ (Å <sup>2</sup> ) | E <sub>0</sub> shift (eV) | R factor | Reduced $\chi^2$ |
|------------------------|-------|----------------|------------------------------|---------------------------|----------|------------------|
| '(1N1H)1Br'            | 1 N/O | 2.06(2)        | -3(3)                        | 1(4)                      | 0.2210   | 58.47            |
|                        | 1 Im  | 2.06(2)        | -1(5)                        |                           |          |                  |
|                        | 1 Br  | 2.43(2)        | 7(3)                         |                           |          |                  |
| '(2N1H)1Br'            | 2 N/O | 2.06(1)        | -1(2)                        | 1(3)                      | 0.1255   | 33.20            |
|                        | 1 Im  | 2.06(1)        | 1(5)                         |                           |          |                  |
|                        | 1 Br  | 2.44(3)        | 8(3)                         |                           |          |                  |
| '(3N1H)1Br'            | 3 N/O | 2.06(1)        | 0(1)                         | 0(2)                      | 0.0797   | 21.07            |
|                        | 1 Im  | 2.06(1)        | 1(4)                         |                           |          |                  |
|                        | 1 Br  | 2.44(2)        | 8(2)                         |                           |          |                  |
| '(4N1H)1Br'            | 4 N/O | 2.06(8)        | 2(1)                         | 0(2)                      | 0.0640   | 16.98            |
|                        | 1 Im  | 2.06(8)        | 1(4)                         |                           |          |                  |
|                        | 1 Br  | 2.44(3)        | 9(2)                         |                           |          |                  |
| '(5N1H)1Br'            | 5 N/O | 2.06(8)        | 4(1)                         | 0(1)                      | 0.0679   | 17.95            |
|                        | 1 Im  | 2.06(8)        | 0(3)                         |                           |          |                  |
|                        | 1 Br  | 2.44(3)        | 11(4)                        |                           |          |                  |
| '(5N1H)1S <sup>a</sup> | 5 N/O | 2.07(7)        | 4(1)                         | 1(1)                      | 0.0598   | 15.82            |
|                        | 1 Im  | 2.07(7)        | 4(2)                         |                           |          |                  |
|                        | 1 S   | 2.66(2)        | 1(3)                         |                           |          |                  |
| '5N1S1H <sup>a</sup>   | 5 N/O | 2.08(1)        | 4(1)                         | 1(1)                      | 0.0568   | 16.21            |
|                        | 1 Im  | 2.06(2)        | 4(2)                         |                           |          |                  |
|                        | 1 S   | 2.66(2)        | 0(2)                         |                           |          |                  |
| '(4N1H)1N'             | 4 N/O | 2.06(1)        | 0(1)                         | 2(1)                      | 0.0632   | 16.71            |
|                        | 1 Im  | 2.06(1)        | 2(4)                         |                           |          |                  |
|                        | 1 N   | 2.21(3)        | -2(3)                        |                           |          |                  |
| '2N2N1H'               | 2 N/O | 2.02           | -3(1)                        | 2(2)                      | 0.0596   | 17.00            |
|                        | 1 Im  | 2.09(3)        | 0(3)                         |                           |          |                  |
|                        | 2 N   | 2.15(2)        | -2(2)                        |                           |          |                  |
| '(3N1H)1N'             | 3 N/O | 2.05(1)        | -1(1)                        | 2(2)                      | 0.0644   | 17.05            |
|                        | 1 Im  | 2.05(1)        | 2(4)                         |                           |          |                  |
|                        | 1 N   | 2.19(2)        | -4(2)                        |                           |          |                  |

<sup>a</sup>Models containing S-donor ligands were discounted since all the sulfur in  $\beta$ 2m is associated with methionine residues or cysteine disulfides.

**Table S4.** Single scattering EXAFS fits for Cu- $\beta$ 2m. Fits carried out in r-space ( $\Delta k = 2$  to  $12.5 \text{ \AA}^{-1}$ ;  $\Delta R = 1$  to  $2.5 \text{ \AA}$ ) with a Kaiser-Bessel window with  $dk = 1$ , a  $k$ -weight = 3 and  $S_0 = 0.9$ . Initial input metal-ligand distances were  $2.0 \text{ \AA}$  for Cu-N(O),  $2.3 \text{ \AA}$  for Cu-S and  $2.4 \text{ \AA}$  for Cu-Br. #v number is the number of independent variables used in the fit.

| Model                                                                                    | R factor | Reduced $\chi^2$ | $\chi^2$ | #v |
|------------------------------------------------------------------------------------------|----------|------------------|----------|----|
| <b><i>XN where X is the number of nitrogen atoms (N)</i></b>                             |          |                  |          |    |
| '2N'                                                                                     | 0.2336   | 5.964            | 97.353   | 3  |
| '3N'                                                                                     | 0.2527   | 6.453            | 105.347  | 3  |
| '4N'                                                                                     | 0.3061   | 7.817            | 127.599  | 3  |
| '5N'                                                                                     | 0.3703   | 9.454            | 154.336  | 3  |
| '6N'                                                                                     | 0.4322   | 11.036           | 180.151  | 3  |
| '7N'                                                                                     | 0.4858   | 12.405           | 202.495  | 3  |
| <b><i>AS where A is the number of sulfur atoms (S)</i></b>                               |          |                  |          |    |
| '2S'                                                                                     | 0.3423   | 8.74             | 142.675  | 3  |
| '3S'                                                                                     | 0.3717   | 9.491            | 154.941  | 3  |
| '4S'                                                                                     | 0.4002   | 10.218           | 166.806  | 3  |
| '5S'                                                                                     | 0.4246   | 10.842           | 176.982  | 3  |
| '6S'                                                                                     | 0.4457   | 11.381           | 185.792  | 3  |
| '7S'                                                                                     | 0.4645   | 11.86            | 193.603  | 3  |
| <b><i>XNYN where X and Y are the number of nitrogen atoms (N) in separate shells</i></b> |          |                  |          |    |
| '2N1N'                                                                                   | 0.1527   | 4.442            | 63.634   | 5  |
| '2N2N'                                                                                   | 0.1836   | 5.342            | 76.524   | 5  |
| '3N1N'                                                                                   | 0.1813   | 5.275            | 75.563   | 5  |
| '4N1N'                                                                                   | 0.2329   | 6.776            | 97.058   | 5  |
| '3N2N'                                                                                   | 0.2353   | 6.846            | 98.067   | 5  |
| '5N1N'                                                                                   | 0.2962   | 8.618            | 123.453  | 5  |
| '4N2N'                                                                                   | 0.299    | 8.701            | 124.634  | 5  |
| '3N3N'                                                                                   | 0.229    | 6.664            | 95.453   | 5  |
| '6N1N'                                                                                   | 0.3625   | 10.548           | 151.098  | 5  |
| '5N2N'                                                                                   | 0.3664   | 10.661           | 152.711  | 5  |
| '4N3N'                                                                                   | 0.2973   | 8.651            | 123.913  | 5  |

| Model                                                                                                              | R factor | Reduced $\chi^2$ | $\chi^2$ | #v |
|--------------------------------------------------------------------------------------------------------------------|----------|------------------|----------|----|
| <b>ASBS where A and B are the number of sulfur atoms (S) in separate shells</b>                                    |          |                  |          |    |
| '2S1S'                                                                                                             | 0.1682   | 4.895            | 70.117   | 5  |
| '2S2S'                                                                                                             | 0.1977   | 5.753            | 82.401   | 5  |
| '3S1S'                                                                                                             | 0.2092   | 6.087            | 87.189   | 5  |
| '4S1S'                                                                                                             | 0.3519   | 10.241           | 146.698  | 5  |
| '3S2S'                                                                                                             | 0.2276   | 6.622            | 94.854   | 5  |
| '5S1S'                                                                                                             | 0.4038   | 11.751           | 168.325  | 5  |
| '4S2S'                                                                                                             | 0.2587   | 7.528            | 107.826  | 5  |
| '3S3S'                                                                                                             | 0.277    | 8.061            | 115.473  | 5  |
| '6S1S'                                                                                                             | 0.4457   | 12.97            | 185.792  | 5  |
| '5S2S'                                                                                                             | 0.2452   | 7.135            | 102.207  | 5  |
| '4S3S'                                                                                                             | 0.3091   | 8.995            | 128.842  | 5  |
| <b>XNAS where X is the number of nitrogen atoms (N) and A is the number of sulfur atoms (S) in separate shells</b> |          |                  |          |    |
| '2N1S'                                                                                                             | 0.1798   | 5.233            | 74.952   | 5  |
| '1N2S'                                                                                                             | 0.1648   | 4.794            | 68.677   | 5  |
| '2N2S'                                                                                                             | 0.2002   | 5.825            | 83.434   | 5  |
| '3N1S'                                                                                                             | 0.2452   | 7.134            | 102.185  | 5  |
| '1N3S'                                                                                                             | 0.165    | 4.8              | 68.759   | 5  |
| '1N4S'                                                                                                             | 0.1653   | 4.81             | 68.903   | 5  |
| '4N1S'                                                                                                             | 0.2075   | 6.037            | 86.477   | 5  |
| '2N3S'                                                                                                             | 0.2028   | 5.901            | 84.524   | 5  |
| '3N2S'                                                                                                             | 0.2465   | 7.172            | 102.732  | 5  |
| '5N1S'                                                                                                             | 0.1983   | 5.771            | 82.671   | 5  |
| '1N5S'                                                                                                             | 0.1943   | 5.653            | 80.976   | 5  |
| '4N2S'                                                                                                             | 0.2533   | 7.372            | 105.598  | 5  |
| '2N4S'                                                                                                             | 0.2017   | 5.869            | 84.062   | 5  |
| '3N3S'                                                                                                             | 0.2435   | 7.085            | 101.492  | 5  |
| '6N1S'                                                                                                             | 0.2011   | 5.851            | 83.809   | 5  |
| '1N6S'                                                                                                             | 0.2185   | 6.358            | 91.068   | 5  |
| '5N2S'                                                                                                             | 0.2325   | 6.766            | 96.917   | 5  |
| '2N5S'                                                                                                             | 0.1885   | 5.486            | 78.584   | 5  |
| '4N3S'                                                                                                             | 0.2767   | 8.052            | 115.339  | 5  |
| '3N4S'                                                                                                             | 0.2406   | 7.001            | 100.281  | 5  |



**Table S5.** Multiple-scattering EXAFS fits for Cu- $\beta$ 2m. Fits carried out in r-space ( $\Delta k = 2$  to  $12.5 \text{ \AA}^{-1}$ ;  $\Delta R = 1$  to  $4.5 \text{ \AA}$ ) with a Kaiser-Bessel window with  $dk = 1$ , a  $k$ -weight = 3 and  $S_0 = 0.9$ . Imidazole scattering paths with an amplitude of 10% or higher were included. Initial input metal-ligand distances were  $2.0 \text{ \AA}$  for Cu-N(O),  $2.3 \text{ \AA}$  for Cu-S and  $2.4 \text{ \AA}$  for Cu-Br. #v number is the number of independent variables used in the fit. Fits that did not converge or produced results outside the resolution of the instrument are not shown.

| Model                                                                                                                                                                           | R factor | Reduced $\chi^2$ | $\chi^2$ | #v |
|---------------------------------------------------------------------------------------------------------------------------------------------------------------------------------|----------|------------------|----------|----|
| <b>(XNWH) where X is the number of nitrogen atoms (N) and W is the number of imidazoles (H) in the same shell</b>                                                               |          |                  |          |    |
| '(1N1H)'                                                                                                                                                                        | 0.1267   | 3.446            | 52.806   | 4  |
| '(2N1H)'                                                                                                                                                                        | 0.1045   | 2.843            | 43.572   | 4  |
| '(3N1H)'                                                                                                                                                                        | 0.0996   | 2.709            | 41.514   | 4  |
| '(4N1H)'                                                                                                                                                                        | 0.1015   | 2.761            | 42.304   | 4  |
| '(5N1H)'                                                                                                                                                                        | 0.1062   | 2.888            | 44.255   | 4  |
| <b>XNWH where X is the number of nitrogen atoms (N) and W is the number of imidazoles (H) in separate shells</b>                                                                |          |                  |          |    |
| '1N1H'                                                                                                                                                                          | 0.1223   | 3.56             | 50.995   | 5  |
| '2N1H'                                                                                                                                                                          | 0.0883   | 2.57             | 36.817   | 5  |
| '3N1H'                                                                                                                                                                          | 0.0802   | 2.335            | 33.441   | 5  |
| '4N1H'                                                                                                                                                                          | 0.0827   | 2.407            | 34.475   | 5  |
| '5N1H'                                                                                                                                                                          | 0.0888   | 2.583            | 36.993   | 5  |
| '1N2H'                                                                                                                                                                          | 0.1235   | 3.593            | 51.462   | 5  |
| '2N2H'                                                                                                                                                                          | 0.1165   | 3.389            | 48.546   | 5  |
| '3N2H'                                                                                                                                                                          | 0.1175   | 3.42             | 48.991   | 5  |
| '4N2H'                                                                                                                                                                          | 0.1196   | 3.481            | 49.86    | 5  |
| <b>(XNWH)YN where X is the number of nitrogen atoms (N), W is the number of imidazoles (H) in the same shell and Y is the number of nitrogen atoms (N) in a separate shell</b>  |          |                  |          |    |
| '(1N1H)1N'                                                                                                                                                                      | 0.0489   | 1.531            | 20.398   | 6  |
| '(2N1H)1N'                                                                                                                                                                      | 0.0499   | 1.562            | 20.806   | 6  |
| '(3N1H)1N'                                                                                                                                                                      | 0.0697   | 2.181            | 29.065   | 6  |
| '(4N1H)1N'                                                                                                                                                                      | 0.0884   | 2.766            | 36.857   | 6  |
| '(1N1H)2N'                                                                                                                                                                      | 0.0833   | 2.606            | 34.728   | 6  |
| '(1N1H)3N'                                                                                                                                                                      | 0.0804   | 2.516            | 33.519   | 6  |
| <b>(XNWH)CBr where X is the number of nitrogen atoms (N), W is the number of imidazoles (H) in the same shell and C is the number of bromine atoms (Br) in a separate shell</b> |          |                  |          |    |
| '(1N1H)1Br'                                                                                                                                                                     | 0.0926   | 2.897            | 38.594   | 6  |
| '(2N1H)1Br'                                                                                                                                                                     | 0.0799   | 2.498            | 33.284   | 6  |
| '(3N1H)1Br'                                                                                                                                                                     | 0.0784   | 2.453            | 32.687   | 6  |
| '(4N1H)1Br'                                                                                                                                                                     | 0.0806   | 2.522            | 33.607   | 6  |
| '(5N1H)1Br'                                                                                                                                                                     | 0.0842   | 2.634            | 35.1     | 6  |

| Model                                                                                                                                                                   | R factor | Reduced $\chi^2$ | $\chi^2$ | #v |
|-------------------------------------------------------------------------------------------------------------------------------------------------------------------------|----------|------------------|----------|----|
| <i><b>XNWHCB</b> where X is the number of nitrogen atoms (N), W is the number of imidazoles (H), and C is the number of bromine atoms (Br) shell in separate shells</i> |          |                  |          |    |
| '1N1H1Br'                                                                                                                                                               | 0.0923   | 3.122            | 38.473   | 7  |
| '2N1H1Br'                                                                                                                                                               | 0.0747   | 2.527            | 31.146   | 7  |
| '3N1H1Br'                                                                                                                                                               | 0.0675   | 2.282            | 28.127   | 7  |
| '4N1H1Br'                                                                                                                                                               | 0.0666   | 2.253            | 27.768   | 7  |

**Table S6.** Table showing bond distances,  $\sigma^2$  component of the Debye-Waller factors and energy shifts for relevant EXAFS fits from the multiple scattering EXAFS fits for Cu- $\beta$ 2m (see above). Fits were carried out as described above. The fit in **bold** was determined to be the best model. Values in **red** are used to discount the model as they produce a physically unreasonable number.

| Cu Model    |       | Radius, R' (Å) | $\sigma^2$ (Å <sup>2</sup> ) | E <sub>0</sub> shift (eV) | R factor      | Reduced $\chi^2$ |
|-------------|-------|----------------|------------------------------|---------------------------|---------------|------------------|
| '(1N1H)1Br' | 1 N/O | 1.95(1)        | 3(4)                         | -1(2)                     | 0.0926        | 2.897            |
|             | 1 lm  | 1.95(1)        | -2(1)                        |                           |               |                  |
|             | 1 Br  | 2.40(2)        | 11(2)                        |                           |               |                  |
| '(2N1H)1Br' | 2 N/O | 1.95(1)        | 12(4)                        | -1(2)                     | 0.0799        | 2.498            |
|             | 1 lm  | 1.95(1)        | -1(1)                        |                           |               |                  |
|             | 1 Br  | 2.40(2)        | 11(2)                        |                           |               |                  |
| '(3N1H)1Br' | 3 N/O | <b>1.95(1)</b> | <b>18(5)</b>                 | -2(1)                     | <b>0.0784</b> | <b>2.453</b>     |
|             | 1 lm  | <b>1.95(1)</b> | <b>2(1)</b>                  |                           |               |                  |
|             | 1 Br  | <b>2.40(2)</b> | <b>12(2)</b>                 |                           |               |                  |
| '(4N1H)1Br' | 4 N/O | 1.95(1)        | 24(5)                        | -2(1)                     | 0.0806        | 2.522            |
|             | 1 lm  | 1.95(1)        | -1(1)                        |                           |               |                  |
|             | 1 Br  | 2.39(2)        | 12(2)                        |                           |               |                  |
| '(5N1H)1Br' | 5 N/O | 1.95(1)        | 30(5)                        | -3(1)                     | 0.0842        | 2.634            |
|             | 1 lm  | 1.95(1)        | -9(3)                        |                           |               |                  |
|             | 1 Br  | 2.39(3)        | 12(3)                        |                           |               |                  |
| '(2N1H)1N'  | 2 N/O | 1.97(1)        | 4(2)                         | 3(1)                      | 0.0499        | 1.562            |
|             | 1 lm  | 1.97(1)        | -2(1)                        |                           |               |                  |
|             | 1 N   | 2.16(1)        | -2(1)                        |                           |               |                  |
| '(3N1H)1N'  | 3 N/O | 1.97(1)        | 11(3)                        | 1(1)                      | 0.0697        | 2.181            |
|             | 1 lm  | 1.97(1)        | -3(1)                        |                           |               |                  |
|             | 1 N   | 2.17(2)        | 0(2)                         |                           |               |                  |
| '4N1H1Br'   | 4 N/O | 2.02(4)        | 3(1)                         | 0(2)                      | 0.0666        | 2.253            |
|             | 1 lm  | 1.95(1)        | 0(1)                         |                           |               |                  |
|             | 1 Br  | 2.40(3)        | 12(3)                        |                           |               |                  |
| '3N1H1Br'   | 3 N/O | 2.01(4)        | 20(5)                        | 0(2)                      | 0.0674        | 2.282            |
|             | 1 lm  | 1.95(1)        | -3(1)                        |                           |               |                  |
|             | 1 Br  | 2.40(2)        | 13(3)                        |                           |               |                  |
| '3N1H'      | 3 N/O | 2.01(3)        | 16(4)                        | 0(2)                      | 0.0802        | 2.334            |
|             | 1 lm  | 1.95(1)        | -3(1)                        |                           |               |                  |

**Table S7.** Single scattering EXAFS fits for Zn- $\beta$ 2m. Fits carried out in r-space ( $\Delta k = 2$  to  $12.5 \text{ \AA}^{-1}$ ;  $\Delta R = 1$  to  $2.5 \text{ \AA}$ ) with a Kaiser-Bessel window with  $dk = 1$ , a  $k$ -weight = 3 and  $S_0 = 0.9$ . Initial input metal-ligand distances were  $2.0 \text{ \AA}$  for Zn-N(O),  $2.3 \text{ \AA}$  for Zn-S and  $2.4 \text{ \AA}$  for Zn-Br. #v number is the number of independent variables used in the fit.

| Model                                                                                    | R factor | Reduced $\chi^2$ | $\chi^2$ | #v |
|------------------------------------------------------------------------------------------|----------|------------------|----------|----|
| <b><i>XN where X is the number of nitrogen atoms (N)</i></b>                             |          |                  |          |    |
| '2N'                                                                                     | 0.4183   | 246.808          | 4145.85  | 3  |
| '3N'                                                                                     | 0.328    | 193.551          | 3251.243 | 3  |
| '4N'                                                                                     | 0.2825   | 166.67           | 2799.694 | 3  |
| '5N'                                                                                     | 0.2667   | 157.384          | 2643.709 | 3  |
| '6N'                                                                                     | 0.2709   | 159.839          | 2684.959 | 3  |
| '7N'                                                                                     | 0.2879   | 169.889          | 2853.772 | 3  |
| <b><i>AS where A is the number of sulfur atoms (S)</i></b>                               |          |                  |          |    |
| '2S'                                                                                     | 0.3475   | 205.04           | 3444.237 | 3  |
| '3S'                                                                                     | 0.27     | 159.348          | 2676.709 | 3  |
| '4S'                                                                                     | 0.2352   | 138.763          | 2330.925 | 3  |
| '5S'                                                                                     | 0.2248   | 132.657          | 2228.359 | 3  |
| '6S'                                                                                     | 0.2287   | 134.965          | 2267.124 | 3  |
| '7S'                                                                                     | 0.2408   | 142.098          | 2386.939 | 3  |
| <b><i>XNYN where X and Y are the number of nitrogen atoms (N) in separate shells</i></b> |          |                  |          |    |
| '2N1N'                                                                                   | 0.1865   | 124.896          | 1848.186 | 5  |
| '2N2N'                                                                                   | 0.1794   | 120.139          | 1777.797 | 5  |
| '3N1N'                                                                                   | 0.173    | 115.906          | 1715.159 | 5  |
| '4N1N'                                                                                   | 0.1886   | 126.336          | 1869.508 | 5  |
| '3N2N'                                                                                   | 0.1986   | 133.047          | 1968.807 | 5  |
| '5N1N'                                                                                   | 0.221    | 148.043          | 2190.718 | 5  |
| '4N2N'                                                                                   | 0.2341   | 156.828          | 2320.716 | 5  |
| '3N3N'                                                                                   | 0.2439   | 163.371          | 2417.541 | 5  |
| '6N1N'                                                                                   | 0.2625   | 175.813          | 2601.653 | 5  |
| '5N2N'                                                                                   | 0.2775   | 185.844          | 2750.088 | 5  |
| '4N3N'                                                                                   | 0.2877   | 192.681          | 2851.261 | 5  |

| Model                                                                                                              | R factor | Reduced $\chi^2$ | $\chi^2$ | #v |
|--------------------------------------------------------------------------------------------------------------------|----------|------------------|----------|----|
| <b>ASBS where A and B are the number of sulfur atoms (S) in separate shells</b>                                    |          |                  |          |    |
| '2S1S'                                                                                                             | 0.1231   | 82.444           | 1219.999 | 5  |
| '2S2S'                                                                                                             | 0.1301   | 87.126           | 1289.271 | 5  |
| '3S1S'                                                                                                             | 0.1296   | 86.807           | 1284.561 | 5  |
| '4S1S'                                                                                                             | 0.2334   | 156.328          | 2313.313 | 5  |
| '3S2S'                                                                                                             | 0.1574   | 105.42           | 1559.996 | 5  |
| '5S1S'                                                                                                             | 0.2248   | 150.587          | 2228.359 | 5  |
| '4S2S'                                                                                                             | 0.223    | 149.372          | 2210.386 | 5  |
| '3S3S'                                                                                                             | 0.195    | 130.606          | 1932.685 | 5  |
| '6S1S'                                                                                                             | 0.2272   | 152.184          | 2251.996 | 5  |
| '5S2S'                                                                                                             | 0.2208   | 147.903          | 2188.645 | 5  |
| '4S3S'                                                                                                             | 0.232    | 155.399          | 2299.573 | 5  |
| <b>XNAS where X is the number of nitrogen atoms (N) and A is the number of sulfur atoms (S) in separate shells</b> |          |                  |          |    |
| '2N1S'                                                                                                             | 0.1176   | 78.793           | 1165.965 | 5  |
| '1N2S'                                                                                                             | 0.123    | 82.357           | 1218.713 | 5  |
| '2N2S'                                                                                                             | 0.1389   | 93.062           | 1377.111 | 5  |
| '3N1S'                                                                                                             | 0.1333   | 89.29            | 1321.294 | 5  |
| '1N3S'                                                                                                             | 0.1357   | 90.919           | 1345.408 | 5  |
| '1N4S'                                                                                                             | 0.1579   | 105.766          | 1565.107 | 5  |
| '4N1S'                                                                                                             | 0.17     | 113.864          | 1684.943 | 5  |
| '2N3S'                                                                                                             | 0.1709   | 114.491          | 1694.227 | 5  |
| '3N2S'                                                                                                             | 0.1766   | 118.294          | 1750.496 | 5  |
| '5N1S'                                                                                                             | 0.2132   | 142.811          | 2113.297 | 5  |
| '1N5S'                                                                                                             | 0.1307   | 87.542           | 1295.437 | 5  |
| '4N2S'                                                                                                             | 0.2093   | 140.215          | 2074.883 | 5  |
| '2N4S'                                                                                                             | 0.1935   | 129.642          | 1918.421 | 5  |
| '3N3S'                                                                                                             | 0.2018   | 135.142          | 1999.81  | 5  |
| '6N1S'                                                                                                             | 0.2411   | 161.491          | 2389.723 | 5  |
| '1N6S'                                                                                                             | 0.1532   | 102.589          | 1518.101 | 5  |
| '5N2S'                                                                                                             | 0.2224   | 148.952          | 2204.171 | 5  |
| '2N5S'                                                                                                             | 0.1224   | 82.001           | 1213.436 | 5  |
| '4N3S'                                                                                                             | 0.2145   | 143.675          | 2126.084 | 5  |
| '3N4S'                                                                                                             | 0.2106   | 141.098          | 2087.941 | 5  |

**Table S8.** Multiple-scattering EXAFS fits for Zn- $\beta$ 2m. Fits carried out in r-space ( $\Delta k = 2$  to  $12.5 \text{ \AA}^{-1}$ ;  $\Delta R = 1$  to  $4.5 \text{ \AA}$ ) with a Kaiser-Bessel window with  $dk = 1$ , a  $k$ -weight = 3 and  $S_0 = 0.9$ . Imidazole scattering paths with an amplitude of 10% or higher were included. Initial input metal-ligand distances were  $2.0 \text{ \AA}$  for Zn-N(O),  $2.3 \text{ \AA}$  for Zn-S and  $2.4 \text{ \AA}$  for Zn-Br. #v number is the number of independent variables used in the fit. Fits that did not converge or produced results outside the resolution of the instrument are not shown.

| Model                                                                                                                                                                         | R factor | Reduced $\chi^2$ | $\chi^2$ | #v |
|-------------------------------------------------------------------------------------------------------------------------------------------------------------------------------|----------|------------------|----------|----|
| <b>(XNWH) where X is the number of nitrogen atoms (N) and W is the number of imidazoles (H) in the same shell</b>                                                             |          |                  |          |    |
| '(1N1H)'                                                                                                                                                                      | 0.383    | 240.314          | 3796.446 | 4  |
| '(2N1H)'                                                                                                                                                                      | 0.2841   | 178.275          | 2816.368 | 4  |
| '(3N1H)'                                                                                                                                                                      | 0.2344   | 147.044          | 2322.98  | 4  |
| '(4N1H)'                                                                                                                                                                      | 0.216    | 135.507          | 2140.713 | 4  |
| '(5N1H)'                                                                                                                                                                      | 0.2176   | 136.554          | 2157.261 | 4  |
| <b>XNWH where X is the number of nitrogen atoms (N) and W is the number of imidazoles (H) in separate shells</b>                                                              |          |                  |          |    |
| '1N1H'                                                                                                                                                                        | 0.3463   | 231.981          | 3432.815 | 5  |
| '2N1H'                                                                                                                                                                        | 0.2832   | 189.681          | 2806.867 | 5  |
| '3N1H'                                                                                                                                                                        | 0.2343   | 156.959          | 2322.662 | 5  |
| '4N1H'                                                                                                                                                                        | 0.2158   | 144.571          | 2139.336 | 5  |
| '5N1H'                                                                                                                                                                        | 0.217    | 145.33           | 2150.576 | 5  |
| <b>(XNWH)AS where X is the number of nitrogen atoms (N), W is the number of imidazoles (H) in the same shell and A is the number of sulfurs atoms (S) in a separate shell</b> |          |                  |          |    |
| '(1N1H)1S'                                                                                                                                                                    | 0.0916   | 65.768           | 907.462  | 6  |
| '(2N1H)1S'                                                                                                                                                                    | 0.0923   | 66.331           | 915.231  | 6  |
| '(3N1H)1S'                                                                                                                                                                    | 0.1231   | 88.403           | 1219.772 | 6  |
| '(4N1H)1S'                                                                                                                                                                    | 0.1522   | 109.349          | 1508.786 | 6  |
| '(1N2H)1S'                                                                                                                                                                    | 0.0739   | 53.062           | 732.143  | 6  |
| '(2N2H)1S'                                                                                                                                                                    | 0.0924   | 66.38            | 915.896  | 6  |
| '(3N2H)1S'                                                                                                                                                                    | 0.1388   | 99.717           | 1375.876 | 6  |
| '(1N3H)1S'                                                                                                                                                                    | 0.0718   | 51.614           | 712.168  | 6  |
| '(2N3H)1S'                                                                                                                                                                    | 0.0961   | 69.017           | 952.293  | 6  |
| '(3N3H)1S'                                                                                                                                                                    | 0.1428   | 102.58           | 1415.384 | 6  |
| '(1N1H)2S'                                                                                                                                                                    | 0.1023   | 73.48            | 1013.864 | 6  |
| '(2N1H)2S'                                                                                                                                                                    | 0.1359   | 97.595           | 1346.597 | 6  |
| '(3N1H)2S'                                                                                                                                                                    | 0.16     | 114.966          | 1586.281 | 6  |

| Model                                                                                                                                                                           | R factor | Reduced $\chi^2$ | $\chi^2$ | #v |
|---------------------------------------------------------------------------------------------------------------------------------------------------------------------------------|----------|------------------|----------|----|
| <i>(XNWH)CBr where X is the number of nitrogen atoms (N), W is the number of imidazoles (H) in the same shell and C is the number of bromine atoms (Br) in a separate shell</i> |          |                  |          |    |
| '(1N1H)1Br'                                                                                                                                                                     | 0.1521   | 109.248          | 1507.391 | 6  |
| '(2N1H)1Br'                                                                                                                                                                     | 0.0895   | 64.311           | 887.354  | 6  |
| '(3N1H)1Br'                                                                                                                                                                     | 0.0714   | 51.274           | 707.472  | 6  |
| '(4N1H)1Br'                                                                                                                                                                     | 0.0757   | 54.382           | 750.356  | 6  |
| '(5N1H)1Br'                                                                                                                                                                     | 0.0894   | 64.215           | 886.029  | 6  |
| '(1N1H)2Br'                                                                                                                                                                     | 0.1514   | 108.733          | 1500.278 | 6  |
| '(2N1H)2Br'                                                                                                                                                                     | 0.1033   | 74.191           | 1023.673 | 6  |
| '(3N1H)2Br'                                                                                                                                                                     | 0.0908   | 65.2             | 899.614  | 6  |
| '(4N1H)2Br'                                                                                                                                                                     | 0.0949   | 68.138           | 940.159  | 6  |
| '(1N2H)1Br'                                                                                                                                                                     | 0.0924   | 66.395           | 916.108  | 6  |
| '(2N2H)1Br'                                                                                                                                                                     | 0.0615   | 44.184           | 609.638  | 6  |
| '(3N2H)1Br'                                                                                                                                                                     | 0.0623   | 44.786           | 617.956  | 6  |
| '(4N2H)1Br'                                                                                                                                                                     | 0.0754   | 54.186           | 747.644  | 6  |
| '(1N3H)1Br'                                                                                                                                                                     | 0.0706   | 50.708           | 699.659  | 6  |
| '(2N3H)1Br'                                                                                                                                                                     | 0.0596   | 42.846           | 591.186  | 6  |
| '(3N3H)1Br'                                                                                                                                                                     | 0.073    | 52.458           | 723.806  | 6  |

**Table S9.** Table showing bond distances,  $\sigma^2$  component of the Debye-Waller factors and energy shifts for relevant EXAFS fits from the multiple-scattering EXAFS fits for Zn- $\beta$ 2m (see above). Fits were carried out as described above. The fit in **bold** was determined to be the best model. Values in **red** are used to discount the model as they produce a physically unreasonable number.

| Zn Model           |              | Radius, R' (Å) | $\sigma^2$ (Å <sup>2</sup> ) | E <sub>0</sub> shift (eV) | R factor      | Reduced $\chi^2$ |
|--------------------|--------------|----------------|------------------------------|---------------------------|---------------|------------------|
| '(1N2H)1Br'        | 1 N/O        | 1.98(1)        | <b>0(3)</b>                  | -8(2)                     | 0.0924        | 66.39            |
|                    | 2 lm         | 1.98(1)        | 4(2)                         |                           |               |                  |
|                    | 1 Br         | 2.37(1)        | 6(1)                         |                           |               |                  |
| <b>'(2N2H)1Br'</b> | <b>2 N/O</b> | <b>1.99(1)</b> | <b>4(2)</b>                  | <b>-8(2)</b>              | <b>0.0615</b> | <b>44.18</b>     |
|                    | <b>2 lm</b>  | <b>1.99(1)</b> | <b>5(2)</b>                  |                           |               |                  |
|                    | <b>1 Br</b>  | <b>2.38(1)</b> | <b>6(1)</b>                  |                           |               |                  |
| '(3N2H)1Br'        | 3 N/O        | 1.99(1)        | 7(2)                         | -8(2)                     | 0.0623        | 44.78            |
|                    | 2 lm         | 1.99(1)        | 5(2)                         |                           |               |                  |
|                    | 1 Br         | 2.38(1)        | 7(1)                         |                           |               |                  |
| <b>'(4N2H)1Br'</b> | <b>4 N/O</b> | <b>1.99(1)</b> | <b>11(3)</b>                 | <b>-8(2)</b>              | <b>0.0754</b> | <b>54.19</b>     |
|                    | <b>2 lm</b>  | <b>1.99(1)</b> | <b>4(2)</b>                  |                           |               |                  |
|                    | <b>1 Br</b>  | <b>2.37(1)</b> | <b>7(1)</b>                  |                           |               |                  |
| '(2N3H)1Br'        | 2 N/O        | 1.99(1)        | 4(2)                         | -8(2)                     | 0.0596        | 42.85            |
|                    | 3 lm         | 1.99(1)        | 8(2)                         |                           |               |                  |
|                    | 1 Br         | 2.38(1)        | 6(1)                         |                           |               |                  |
| <b>'(1N3H)1Br'</b> | <b>1 N/O</b> | <b>1.99(1)</b> | <b>1(3)</b>                  | <b>-8(2)</b>              | <b>0.0706</b> | <b>50.71</b>     |
|                    | <b>3 lm</b>  | <b>1.99(1)</b> | <b>6(2)</b>                  |                           |               |                  |
|                    | <b>1 Br</b>  | <b>2.37(1)</b> | <b>6(1)</b>                  |                           |               |                  |
| '(3N1H)1Br'        | 3 N/O        | 1.98(1)        | 5(2)                         | -9(2)                     | 0.0714        | 51.27            |
|                    | 1 lm         | 1.98(1)        | 3(3)                         |                           |               |                  |
|                    | 1 Br         | 2.37(1)        | 6(1)                         |                           |               |                  |
| <b>'(1N3H)1S'</b>  | <b>1 N/O</b> | <b>1.95(1)</b> | <b>-3(1)</b>                 | <b>-10(2)</b>             | <b>0.0718</b> | <b>51.61</b>     |
|                    | <b>3 lm</b>  | <b>1.95(1)</b> | <b>11(3)</b>                 |                           |               |                  |
|                    | <b>1 S</b>   | <b>2.23(1)</b> | <b>1(1)</b>                  |                           |               |                  |
| '(3N3H)1Br'        | 3 N/O        | 1.99(1)        | 8(3)                         | -8(2)                     | 0.0730        | 52.46            |
|                    | 3 lm         | 1.99(1)        | 7(3)                         |                           |               |                  |
|                    | 1 Br         | 2.38(1)        | 7(1)                         |                           |               |                  |
| <b>'(1N2H)1S'</b>  | <b>1 N/O</b> | <b>1.96(1)</b> | <b>-3(1)</b>                 | <b>-10(2)</b>             | <b>0.0739</b> | <b>53.06</b>     |
|                    | <b>2 lm</b>  | <b>1.96(1)</b> | <b>8(3)</b>                  |                           |               |                  |
|                    | <b>1 S</b>   | <b>2.23(1)</b> | <b>1(1)</b>                  |                           |               |                  |



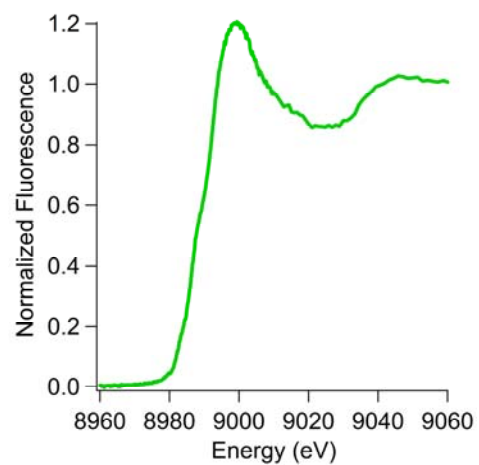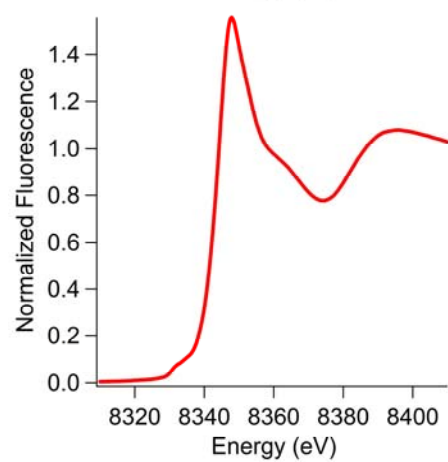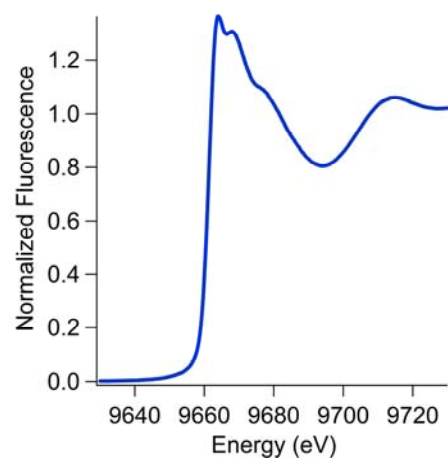

**Figure S1.** Metal K-edges XANES spectra from Table 1 for metal complexes of  $\beta 2m$  in 150 mM KBr, 25 mM MOPS (pH = 7.4) and 10% glycerol in the presence of Cu(II) (green), Ni(II) (red), and Zn (blue).

**Table S10:** XANES analysis of metal complexes of  $\beta$ 2m in 150 mM KBr, 25 mM MOPS (pH = 7.4) and 10% glycerol in the presence of Cu(II), Ni(II), and Zn(II).

|        | 1s $\rightarrow$ 3d peak area ( $\times 10^{-2}$ eV) | 1s $\rightarrow$ 4pz observed | Coordination number | Edge energy (eV) |
|--------|------------------------------------------------------|-------------------------------|---------------------|------------------|
| Cu(II) | NA                                                   | shoulder                      | NA                  | 8987.2           |
| Ni(II) | 5.2(7)                                               | No                            | 6                   | 8344.5           |
| Zn(II) | NA                                                   | NA                            | 5                   | 9661.4           |

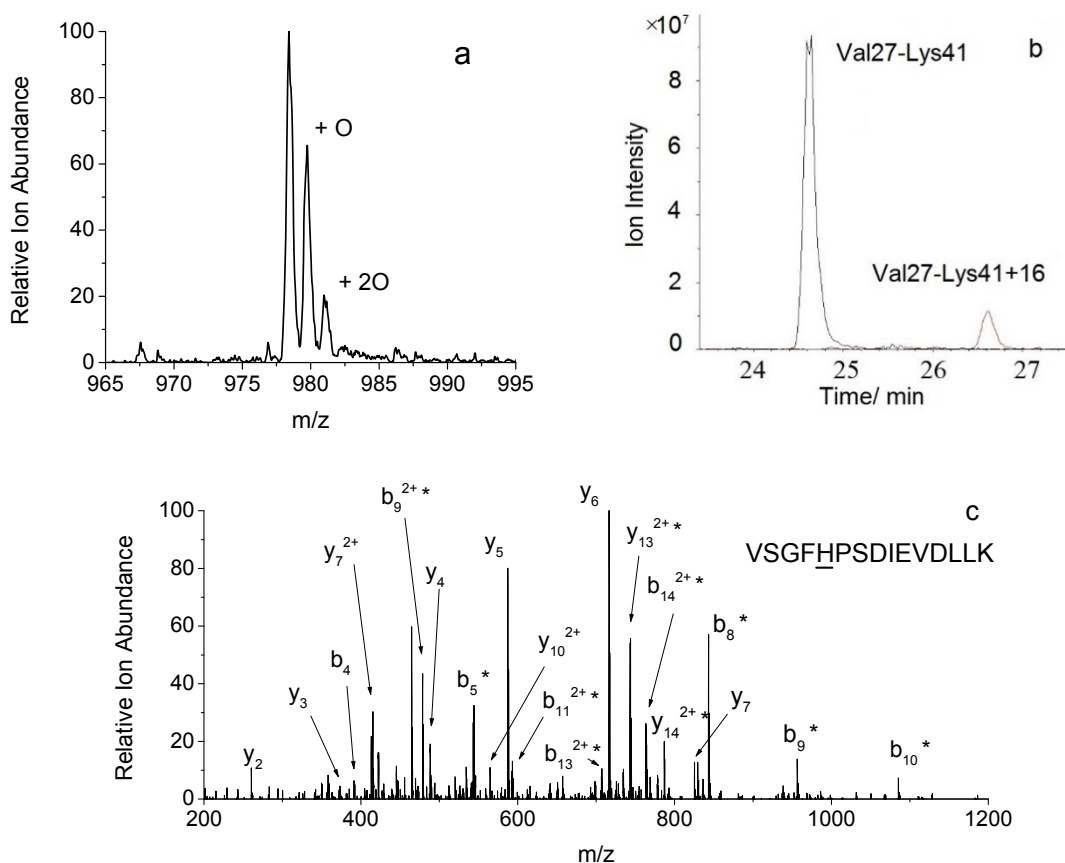

**Figure S2.** (a) ESI mass spectrum around + 12 charge states of  $\beta$ 2m after the MCO reaction with Ni(II). Legend: +1O, addition of 16 Da; +2O, addition of 32 Da. (b) Extracted ion chromatogram of the unmodified (m/z 828.4) and modified (m/z 836.4) forms of the peptide Val27-Lys41 after the MCO reaction of  $\beta$ 2m-Ni(II). The oxidation percentage was determined by comparing the LC-MS intensities of modified and unmodified peptide containing the amino acid of interest. (c) CID mass spectrum of  $[\text{Val27-Lys41+16}]^{3+}$ , showing oxidation occurs at His31. The peaks labeled with asterisks correspond to oxidized product ions.

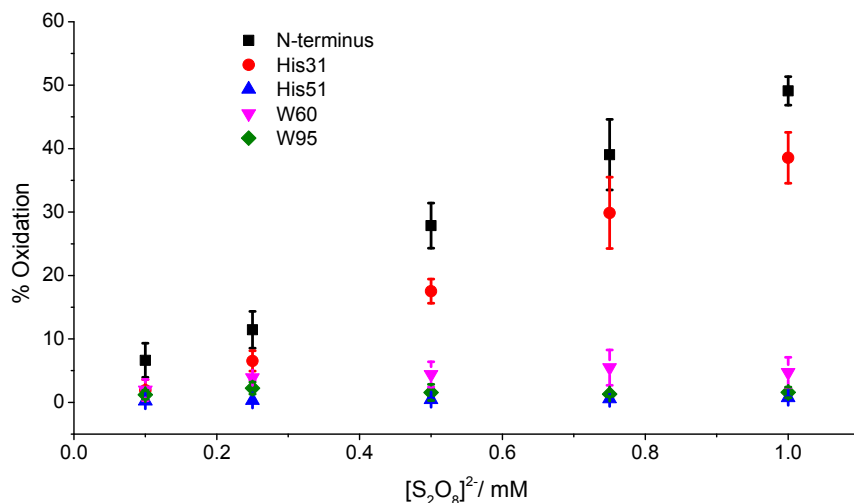

**Figure S3.** Oxidation percentages for modified residues after 200  $\mu\text{M}$   $\beta\text{2m}$  was reacted with 250  $\mu\text{M}$   $\text{NiSO}_4$ , 5 mM ascorbate, and 0.1-1 mM  $\text{S}_2\text{O}_8^{2-}$  in 150 mM potassium acetate and 25 mM MOPS at pH 7.4 and 25  $^\circ\text{C}$ .

Calculations to estimate the percent decrease in Cu(II)- $\beta\text{2m}$  loading in the presence and absence of 3 mM Ni(II) with 100  $\mu\text{M}$   $\beta\text{2m}$  and 150  $\mu\text{M}$  Cu(II) present. Dissociation constants previously reported ( $K_d^{\text{Cu}} = 2.5 \mu\text{M}$ ,  $K_d^{\text{Ni}} = 400 \mu\text{M}$ ) were used for these calculations.

| Sample                              | $\beta\text{2m-Cu(II)-Ni(II)}$                  |        |        | $\beta\text{2m-Cu(II)}$ |        |
|-------------------------------------|-------------------------------------------------|--------|--------|-------------------------|--------|
|                                     | $\beta\text{2m}$                                | Cu(II) | Ni(II) | $\beta\text{2m}$        | Cu(II) |
| Conc/ $\mu\text{M}$                 | 100                                             | 150    | 3000   | 100                     | 150    |
| $[\beta\text{2m-Ni}] / \mu\text{M}$ |                                                 | 19     |        |                         | 0      |
| $[\beta\text{2m-Cu}] / \mu\text{M}$ |                                                 | 77     |        |                         | 96     |
|                                     | Percent decrease of $\beta\text{2m-Cu}$ : 19.7% |        |        |                         |        |

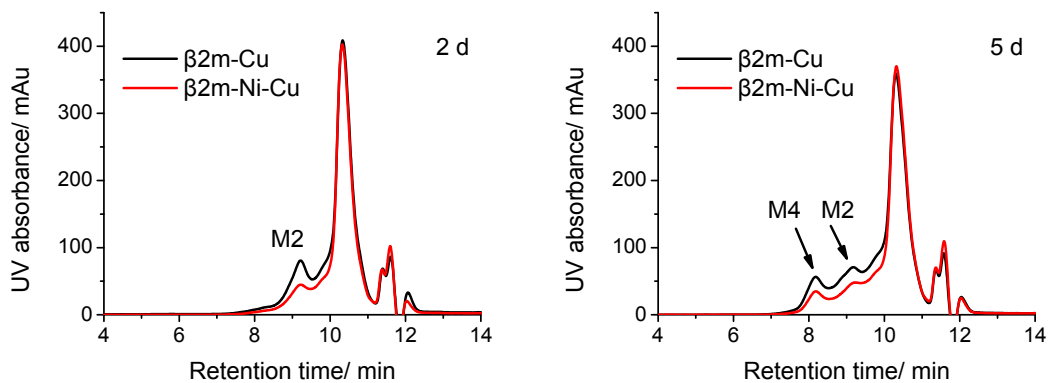

**Figure S4.** SEC analyses of 100  $\mu\text{M}$   $\beta 2\text{m}$  and 150  $\mu\text{M}$   $\text{CuSO}_4$  incubated without (black) and with 3 mM  $\text{NiSO}_4$  (red) in 500 mM urea, 150 mM potassium acetate and 25 mM MOPS at pH 7.4 and 37  $^\circ\text{C}$

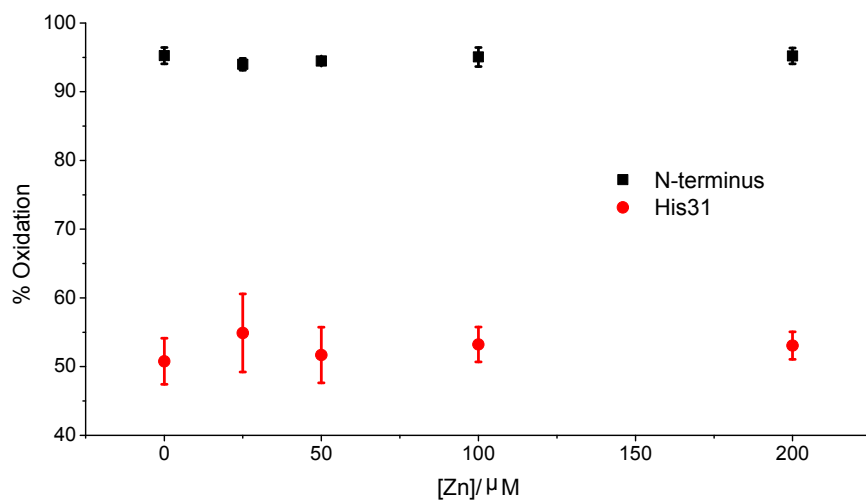

**Figure S5.** Oxidation percentages of the N-terminus and His31 after 5  $\mu\text{M}$   $\beta 2\text{m}$  is reacted with 5  $\mu\text{M}$   $\text{CuSO}_4$ , 0-200  $\mu\text{M}$   $\text{ZnSO}_4$ , 0.5 mM ascorbate, and 25  $\mu\text{M}$   $\text{S}_2\text{O}_8^{2-}$  in 150 mM potassium acetate and 25 mM MOPS at pH 7.4 and 25  $^\circ\text{C}$  for 1 min.

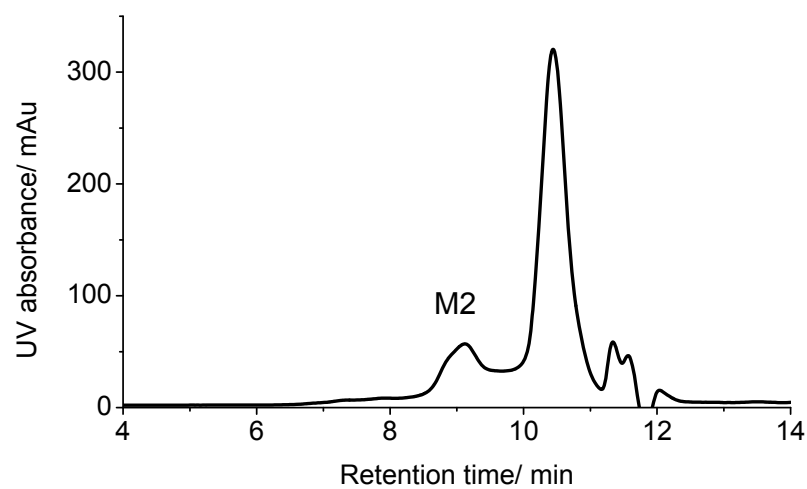

**Figure S6.** SEC analysis of 100  $\mu\text{M}$   $\beta\text{2m}$  and 100  $\mu\text{M}$   $\text{ZnSO}_4$  incubated in a solution containing 150 mM potassium acetate and 25 mM MOPS at pH 7.4 and 37  $^\circ\text{C}$  for 1 day.

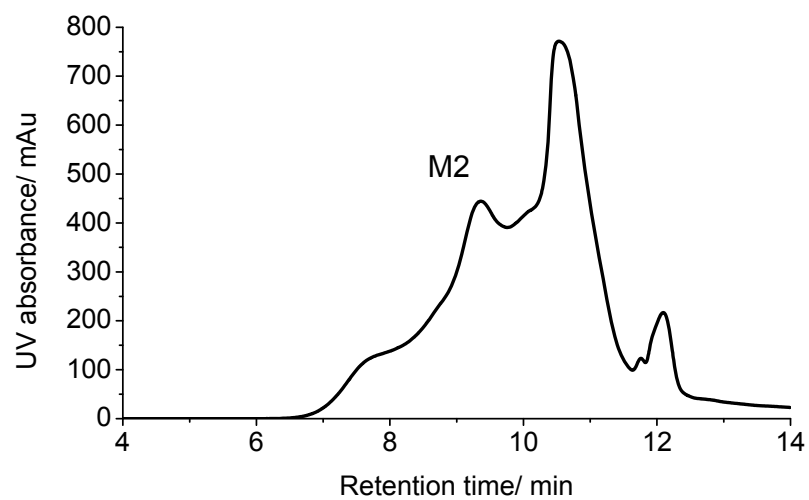

**Figure S7.** SEC analysis of 2 mM  $\beta\text{2m}$  and 1.2 mM  $\text{ZnSO}_4$  equilibrated in 150 mM KBr and 25 mM MOPS at pH 7.4 and 25  $^\circ\text{C}$ .

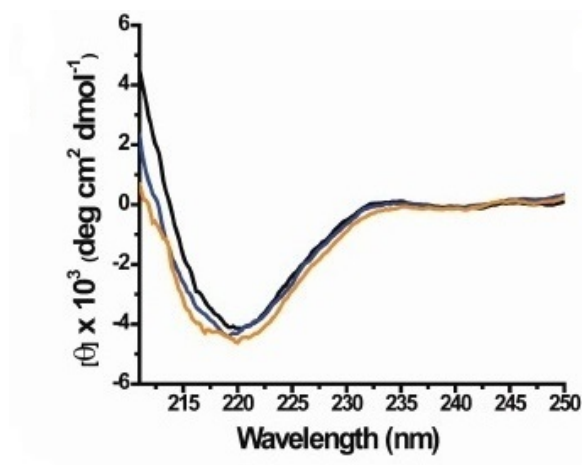

**Figure S8.** Far-UV CD spectra of  $\beta 2m$  in the absence (black) and presence of divalent metal ions: Cu(II) (blue), Ni(II) (green), and Zn(II) (orange).

**Table S11.** Global hydrogen deuterium exchange rates of the amide hydrogens for  $\beta 2m$  incubated in the absence and presence of Cu(II)/ Ni(II)/ Zn(II)

|                   | HDX results (Fast) |                 | HDX results (Slow) |                   | Total # D      |
|-------------------|--------------------|-----------------|--------------------|-------------------|----------------|
|                   | # D                | Rate / min      | # D                | Rate/ min         |                |
| $\beta 2m$        | $40.67 \pm 0.85$   | $8.37 \pm 0.42$ | $15.83 \pm 3.24$   | $0.14 \pm 0.05$   | $56.5 \pm 2.4$ |
| Cu(II)            | $46.5 \pm 3.5$     | $8.54 \pm 0.41$ | $20.6 \pm 4.3$     | $0.039 \pm 0.019$ | $67.0 \pm 7.8$ |
| $\beta 2m$ Ni(II) | $50.5 \pm 5.4$     | $9.6 \pm 3.0$   | $16.19 \pm 2.84$   | $0.05 \pm 0.04$   | $66.7 \pm 4.0$ |
| Zn(II)            | $49.1 \pm 2.3$     | $8.1 \pm 0.23$  | $18.36 \pm 2.66$   | $0.041 \pm 0.017$ | $67.4 \pm 0.3$ |
